# Supplementary material
Source: HighWire-hosted journal article supplement (https://bmjopenquality.bmj.com/highwire/filestream/143046/field_highwire_adjunct_files/0/bmjoq-2021-001625supp001_data_supplement.pdf)
Supplement: bmjoq-2021-001625supp001_data_supplement.pdf [file bmjoq-2021-001625supp001_data_supplement.pdf]

## Healthy Beginnings Antenatal Program Criteria

| Condition                     | PPROM                                                                                                                                                                                                         | Preterm Labour                                                                                                             | Hypertension                                                                                                                                                                                                                                                | Decreased Placental Function                                                                                                 | Multi-fetal Gestation                                                                                                                                                                                                                                                 | Cholestasis                           | Antepartum Hemorrhage                                                                                                                                                                                                                                                                                                                       |
|-------------------------------|---------------------------------------------------------------------------------------------------------------------------------------------------------------------------------------------------------------|----------------------------------------------------------------------------------------------------------------------------|-------------------------------------------------------------------------------------------------------------------------------------------------------------------------------------------------------------------------------------------------------------|------------------------------------------------------------------------------------------------------------------------------|-----------------------------------------------------------------------------------------------------------------------------------------------------------------------------------------------------------------------------------------------------------------------|---------------------------------------|---------------------------------------------------------------------------------------------------------------------------------------------------------------------------------------------------------------------------------------------------------------------------------------------------------------------------------------------|
| <b>Gestation</b>              | 24 – 37 wks                                                                                                                                                                                                   | 24 - 34 wks                                                                                                                | 24 – 40 wks                                                                                                                                                                                                                                                 | 24-37 wks                                                                                                                    | 24 – 37 wks                                                                                                                                                                                                                                                           | Up to 37 wks                          | 24-37 wks                                                                                                                                                                                                                                                                                                                                   |
| <b>Criteria for Admission</b> | ROM confirmed (US, nitrazine, ferning, pooling)                                                                                                                                                               | Uterine contractions < 10 min. apart and/or progressive cervical changes)<br>If short cervix is a concern, length < 2.5 cm | BP 140/90 - 150/105;<br>on 2 occasions at least 6 hours apart                                                                                                                                                                                               | Fetal weight 3 <sup>rd</sup> – 10 <sup>th</sup> percentile<br>Normal Doppler<br>AFI > 3 cm<br>BPP 8/8                        | Confirmed by U/S<br>S/S of: <ul style="list-style-type: none"> <li>PTL</li> <li>Hypertension and/or</li> <li>Decreased placental function</li> </ul>                                                                                                                  | Elevated serum bile acids<br>Pruritis | APH: <ul style="list-style-type: none"> <li>-Less than 3 bleeding episodes</li> <li>-Bleeding has resolved for 48 hrs</li> <li>-Inpatient for 48 hrs</li> </ul> Previa: <ul style="list-style-type: none"> <li>Complete previa or placenta &lt;2cm from cervical os</li> <li>Access to telephone and transportation at ALL times</li> </ul> |
| <b>Limits</b>                 | Absence of: <ul style="list-style-type: none"> <li>active labour</li> <li>uterine tenderness</li> <li>active bleeding</li> <li>foul smelling vaginal discharge</li> </ul> AFI > 3 cm<br>Cephalic presentation | Maximum cervical dilation: 3 cm<br>Absence of chorioamnionitis<br>No vaginal bleeding                                      | Absence of S/S of severe GH and/or HELLP<br>Blood work: <ul style="list-style-type: none"> <li>ALT &lt; 40 u/L</li> <li>LDH &lt; 200 u/L</li> <li>Platelets &gt; 100,000/mm</li> <li>Serum creatinine &lt; 100 mmol/L</li> </ul> Proteinuria ≤ 2+/100 mg/dL | Not < 3rd percentile<br>No absent end-diastolic cord artery Doppler flow<br>≤ 4 contractions per hour<br>No vaginal bleeding | Meets criteria of other condition(s)<br>Membranes intact<br>Special situations:<br>Require perinatology referral <ul style="list-style-type: none"> <li>Twin to twin transfusion @ 24-37 wks</li> <li>DA/MC twins @ 24-37 wks</li> <li>Triples @ 24-37 wks</li> </ul> | Abnormal BPP/NST                      | Hgb ≤ 104 g/L<br>Active vaginal bleeding<br>Abnormal BPP/NST<br>Abdominal pain<br>Contractions >6 per hour                                                                                                                                                                                                                                  |
| <b>Other</b>                  | Antibiotics as per protocol<br>GBS swabs sent                                                                                                                                                                 |                                                                                                                            |                                                                                                                                                                                                                                                             |                                                                                                                              |                                                                                                                                                                                                                                                                       |                                       | Reside 30 minutes from nearest hospital able to support GA                                                                                                                                                                                                                                                                                  |
